# Supplementary material
Source: PubMed Central journal article supplement (PMC2278188)

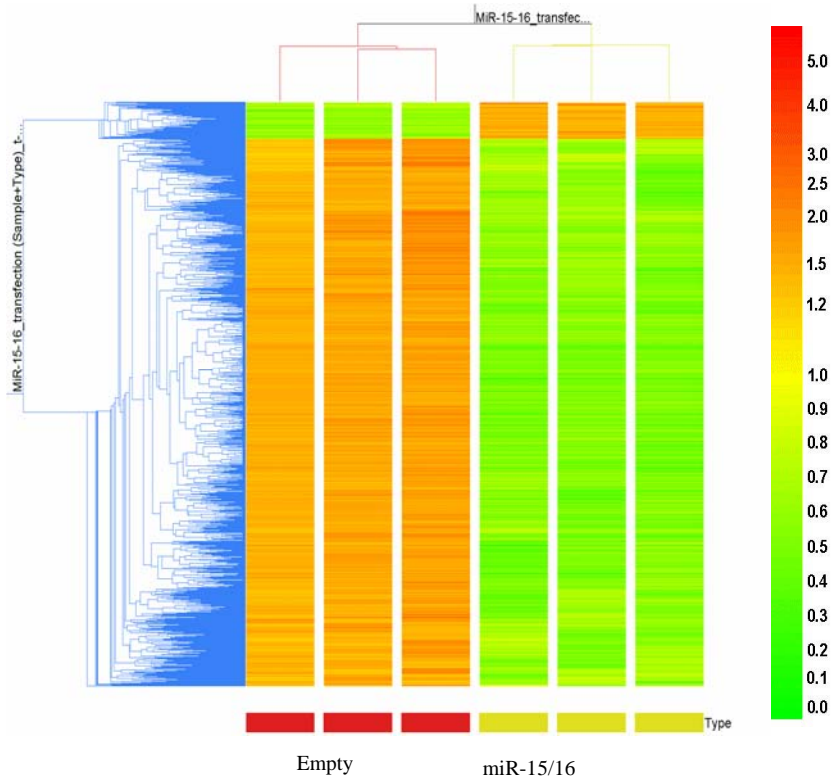

Supplement: pnas_0800121105_1.pdf [file pnas_0800121105_1.pdf]

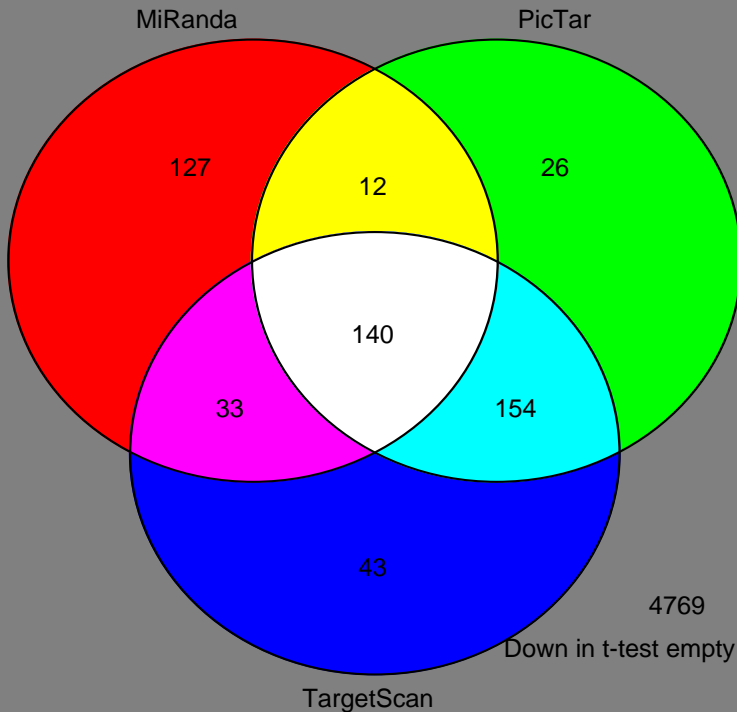

4769

Down in t-test empty vs miR

TargetScan

Supplement: pnas_0800121105_2.pdf [file pnas_0800121105_2.pdf]
